# Supplementary figures and images for: HBM4EU Chromates Study: Urinary Metabolomics Study of Workers Exposed to Hexavalent Chromium
Source: MDPI journal article supplement (doi:10.3390/metabo12040362), 2022-04-18

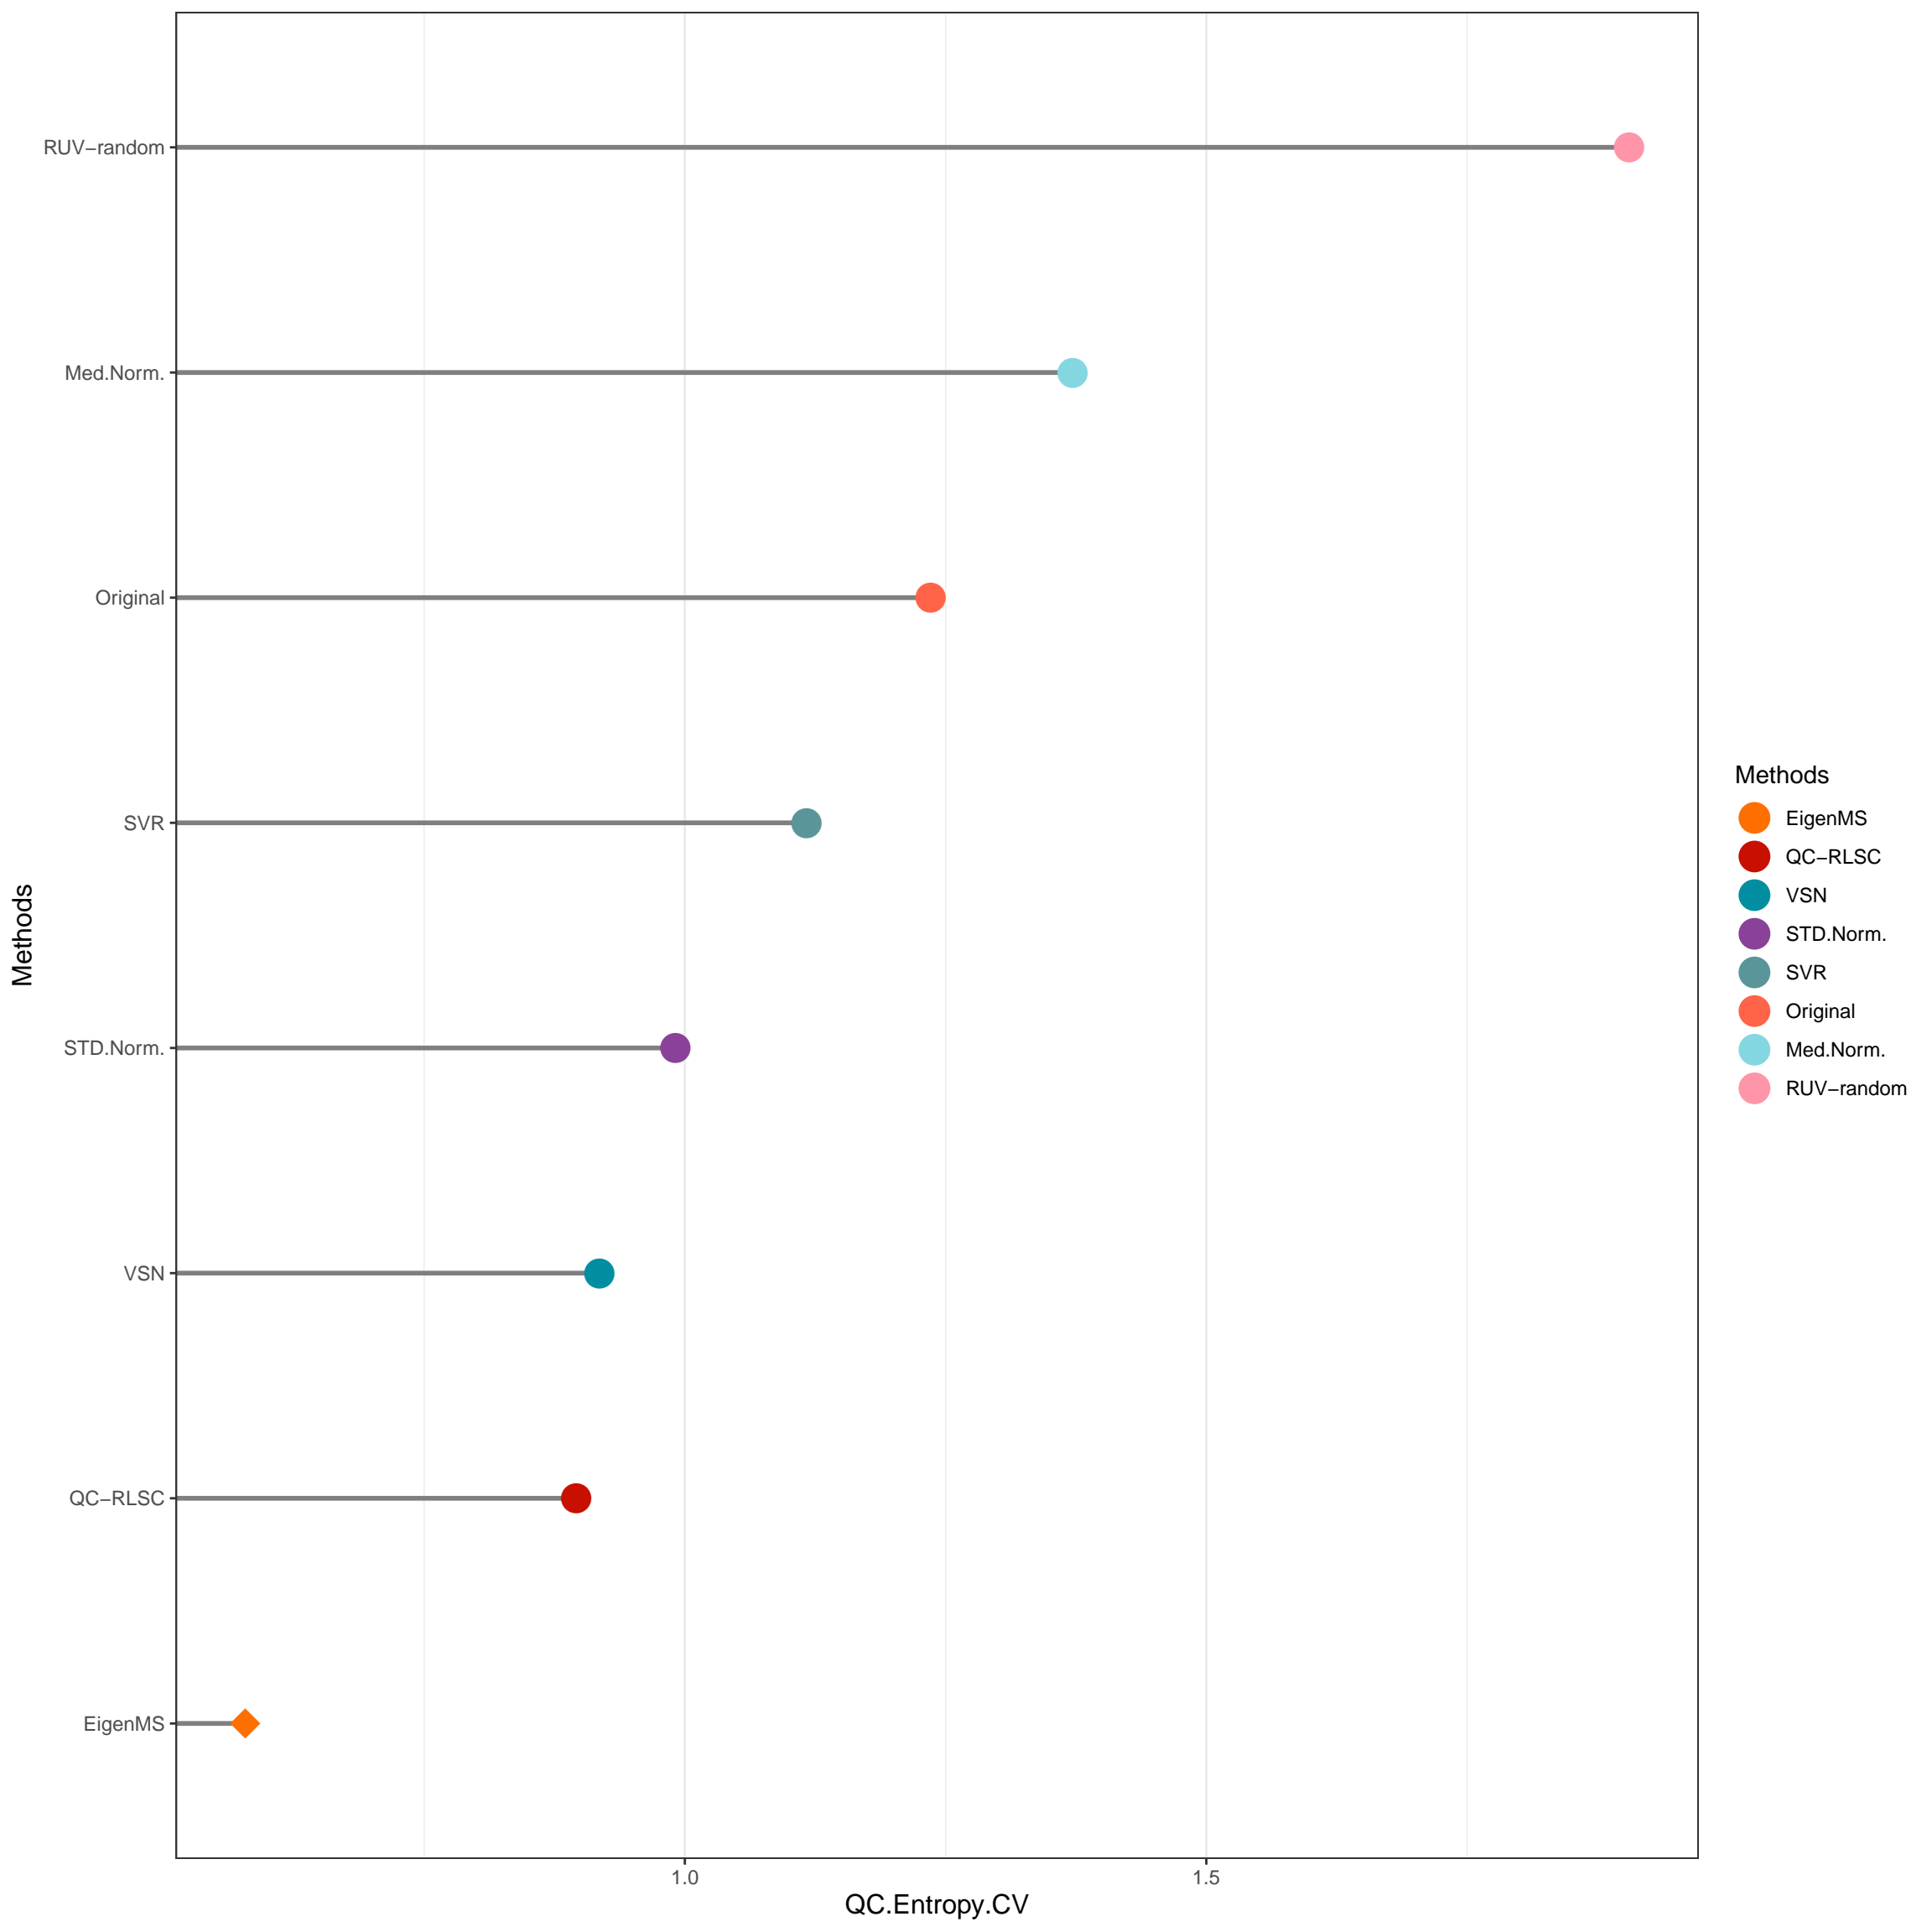

Supplement: s1 [file s1]

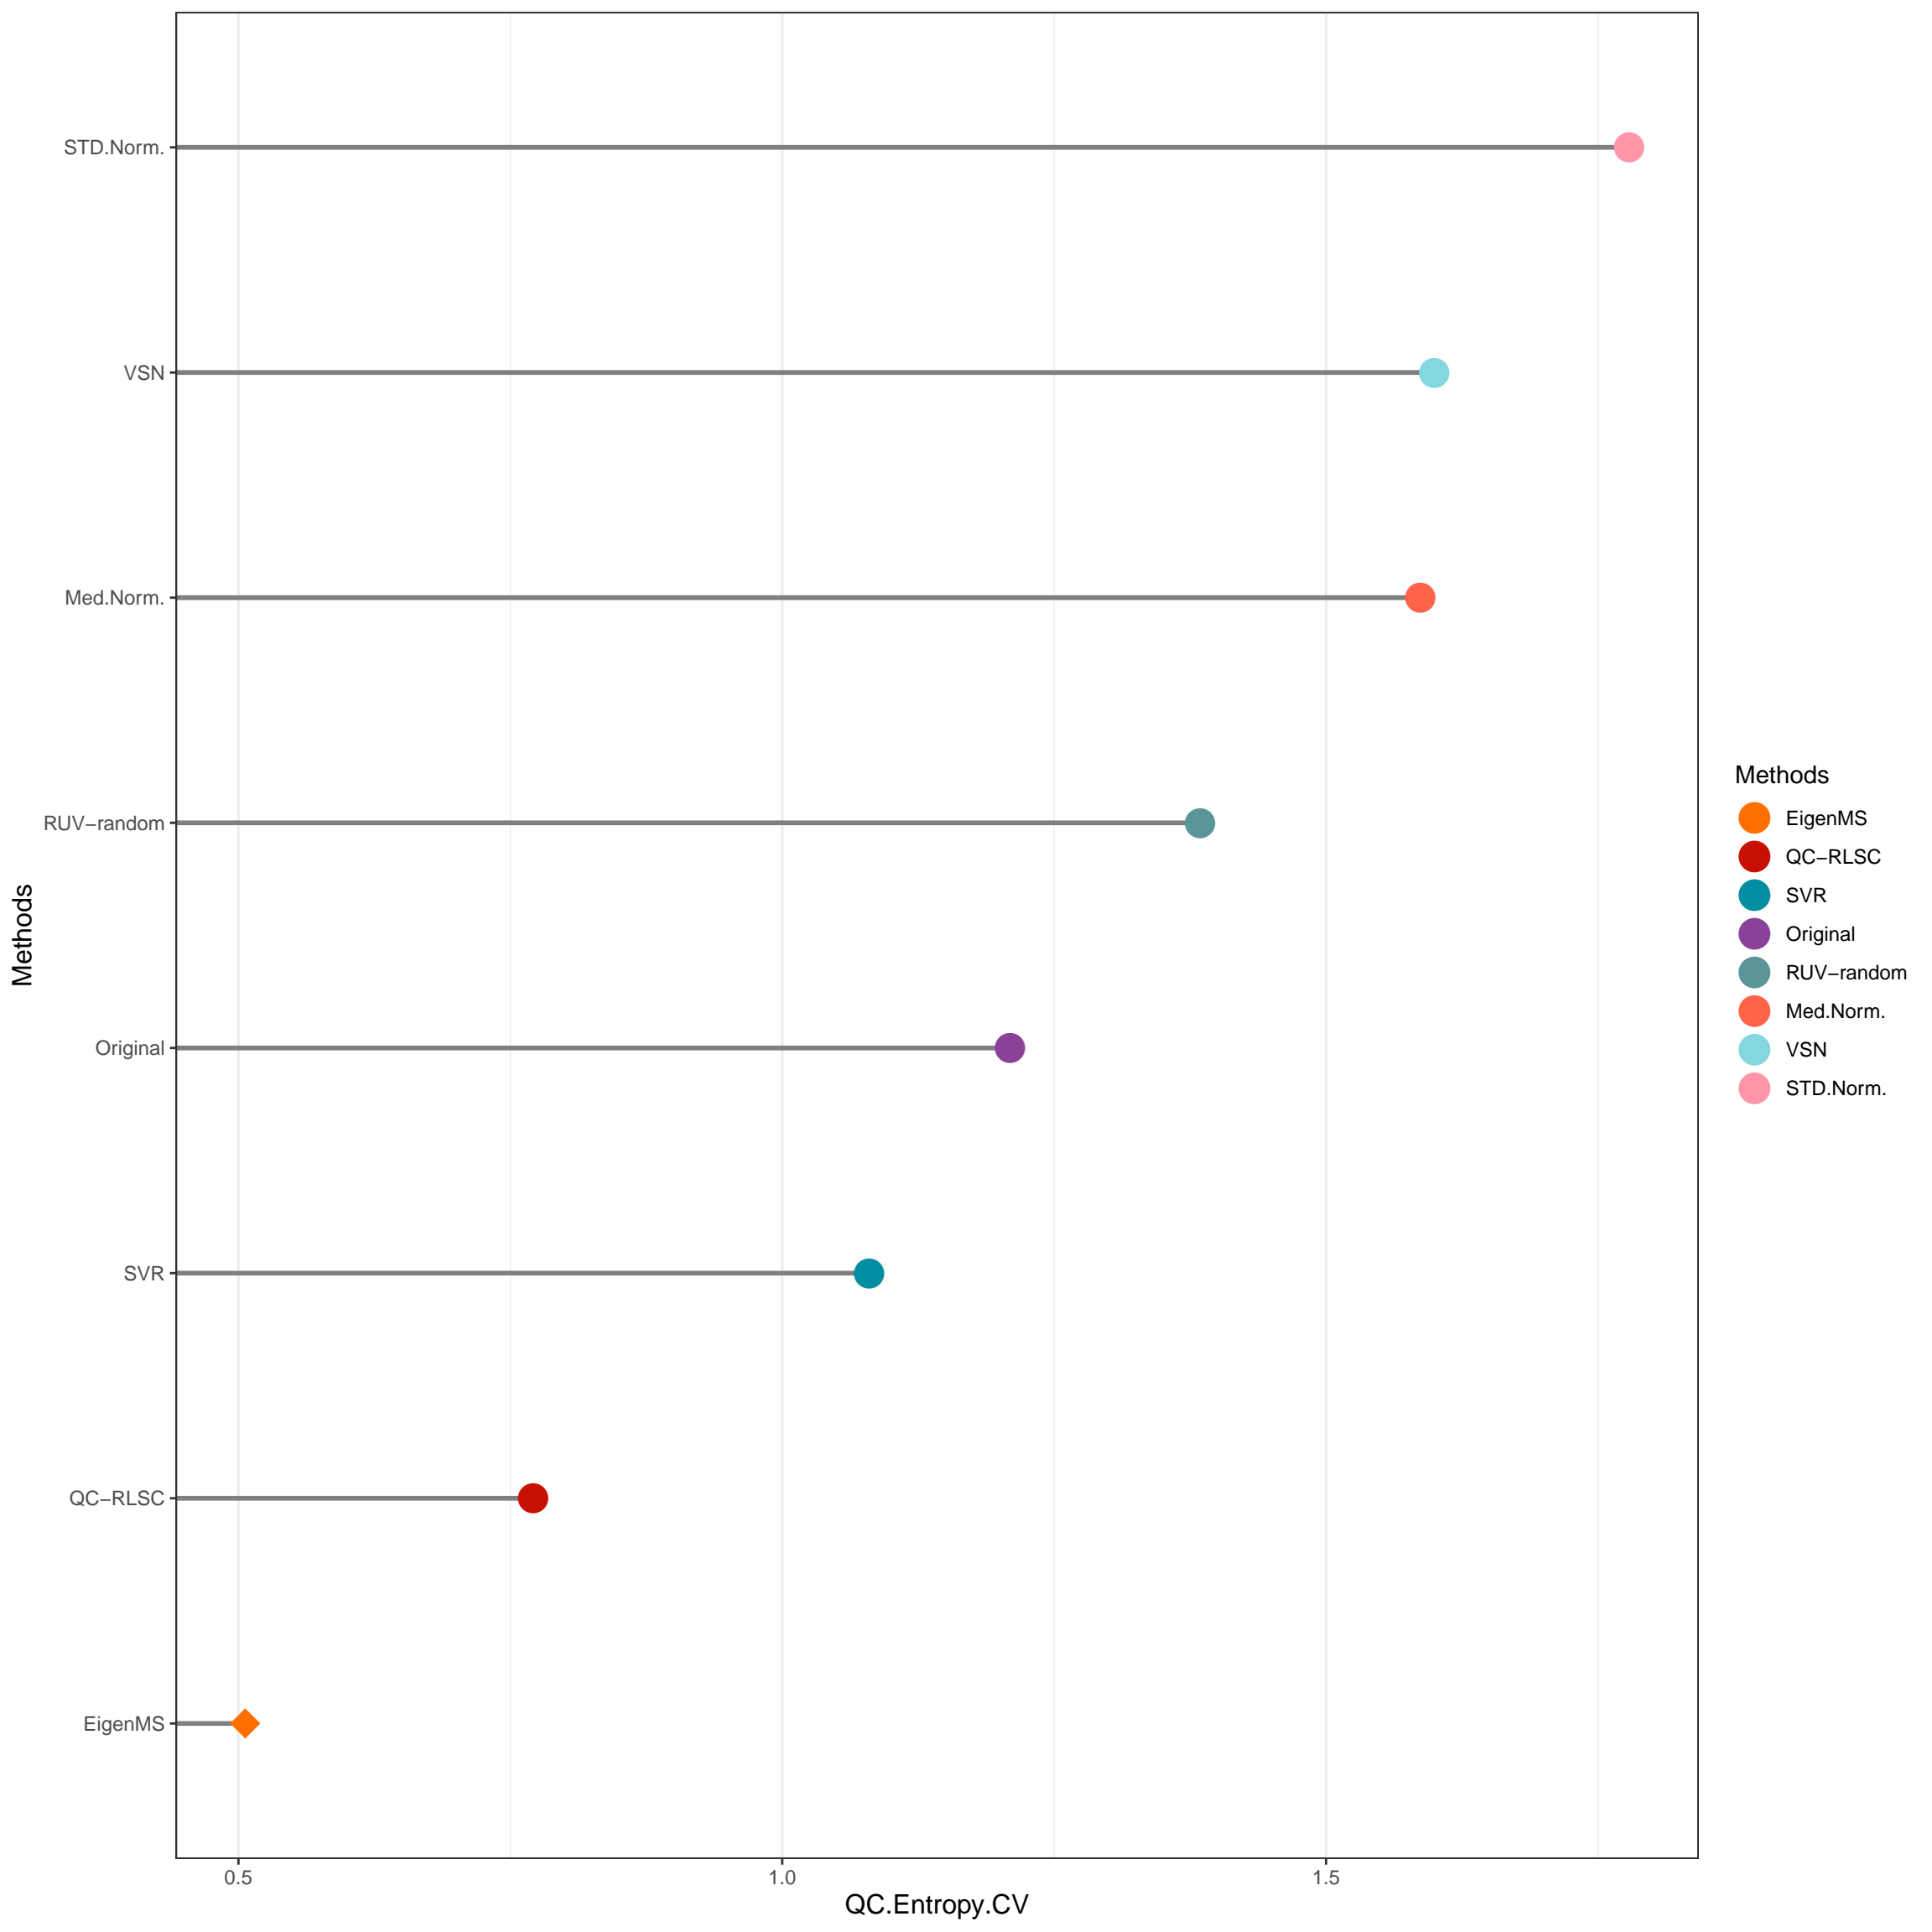

Supplement: s1 [file s1]

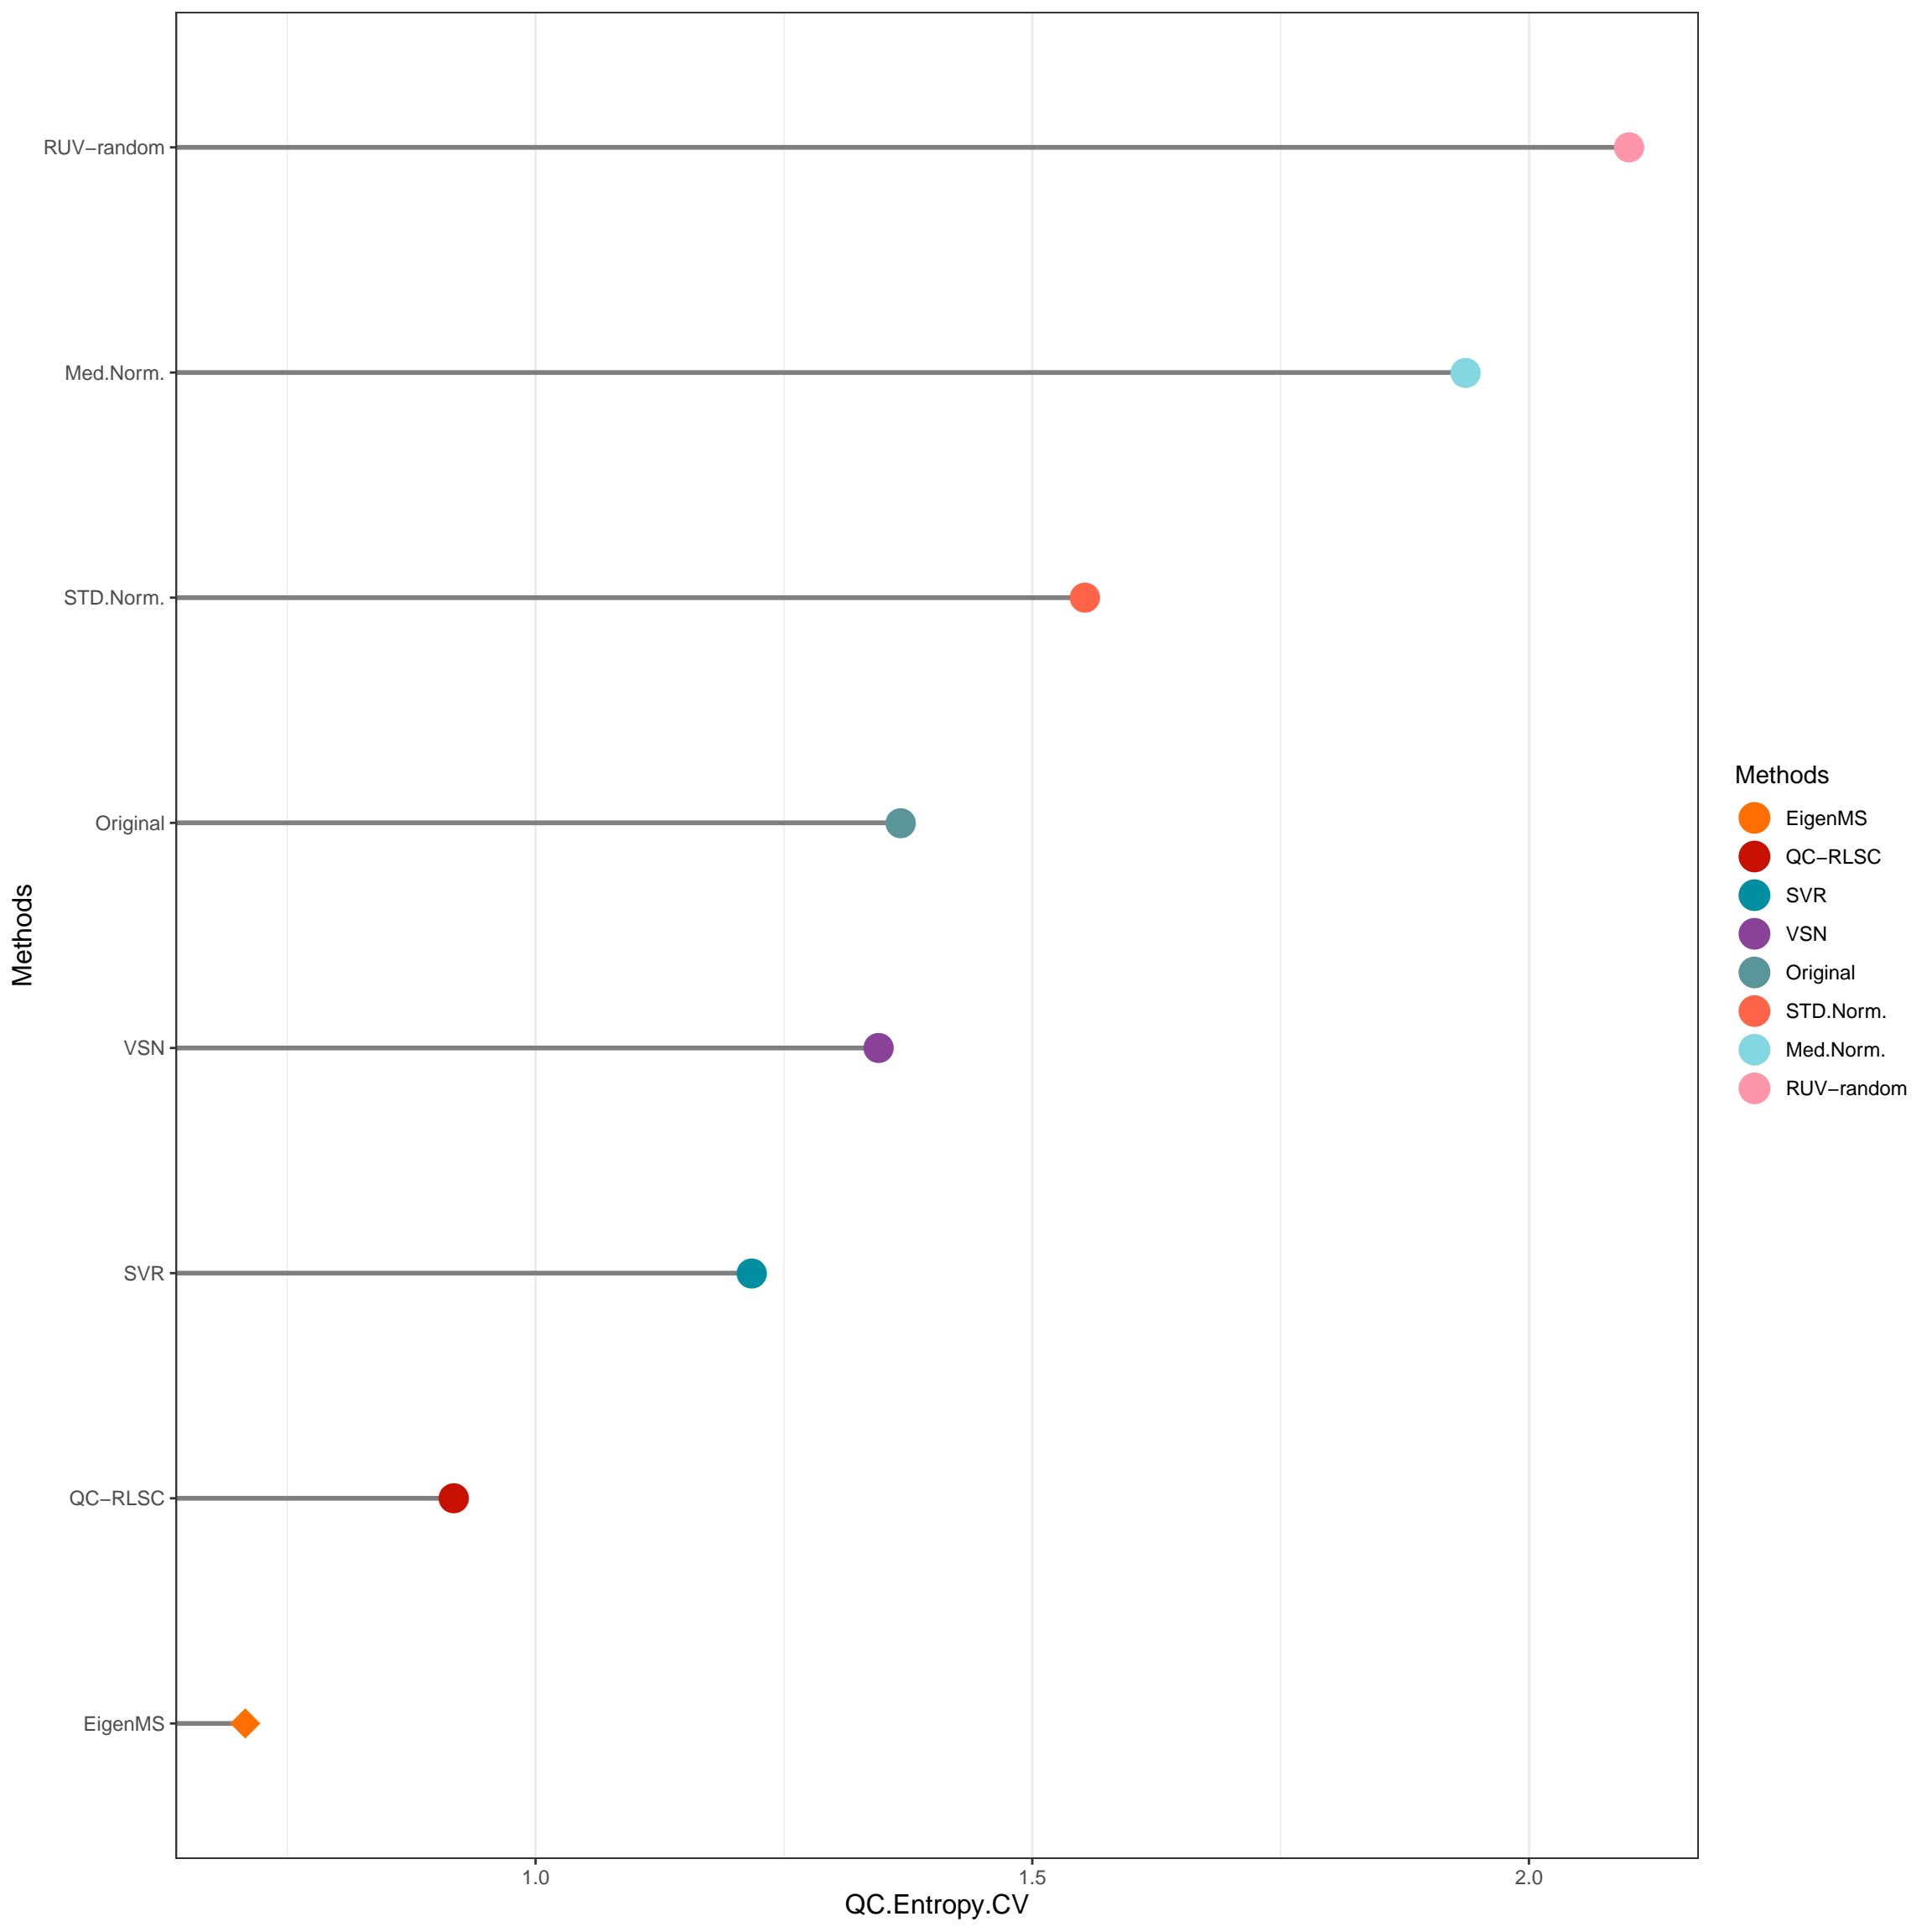

Supplement: s1 [file s1]

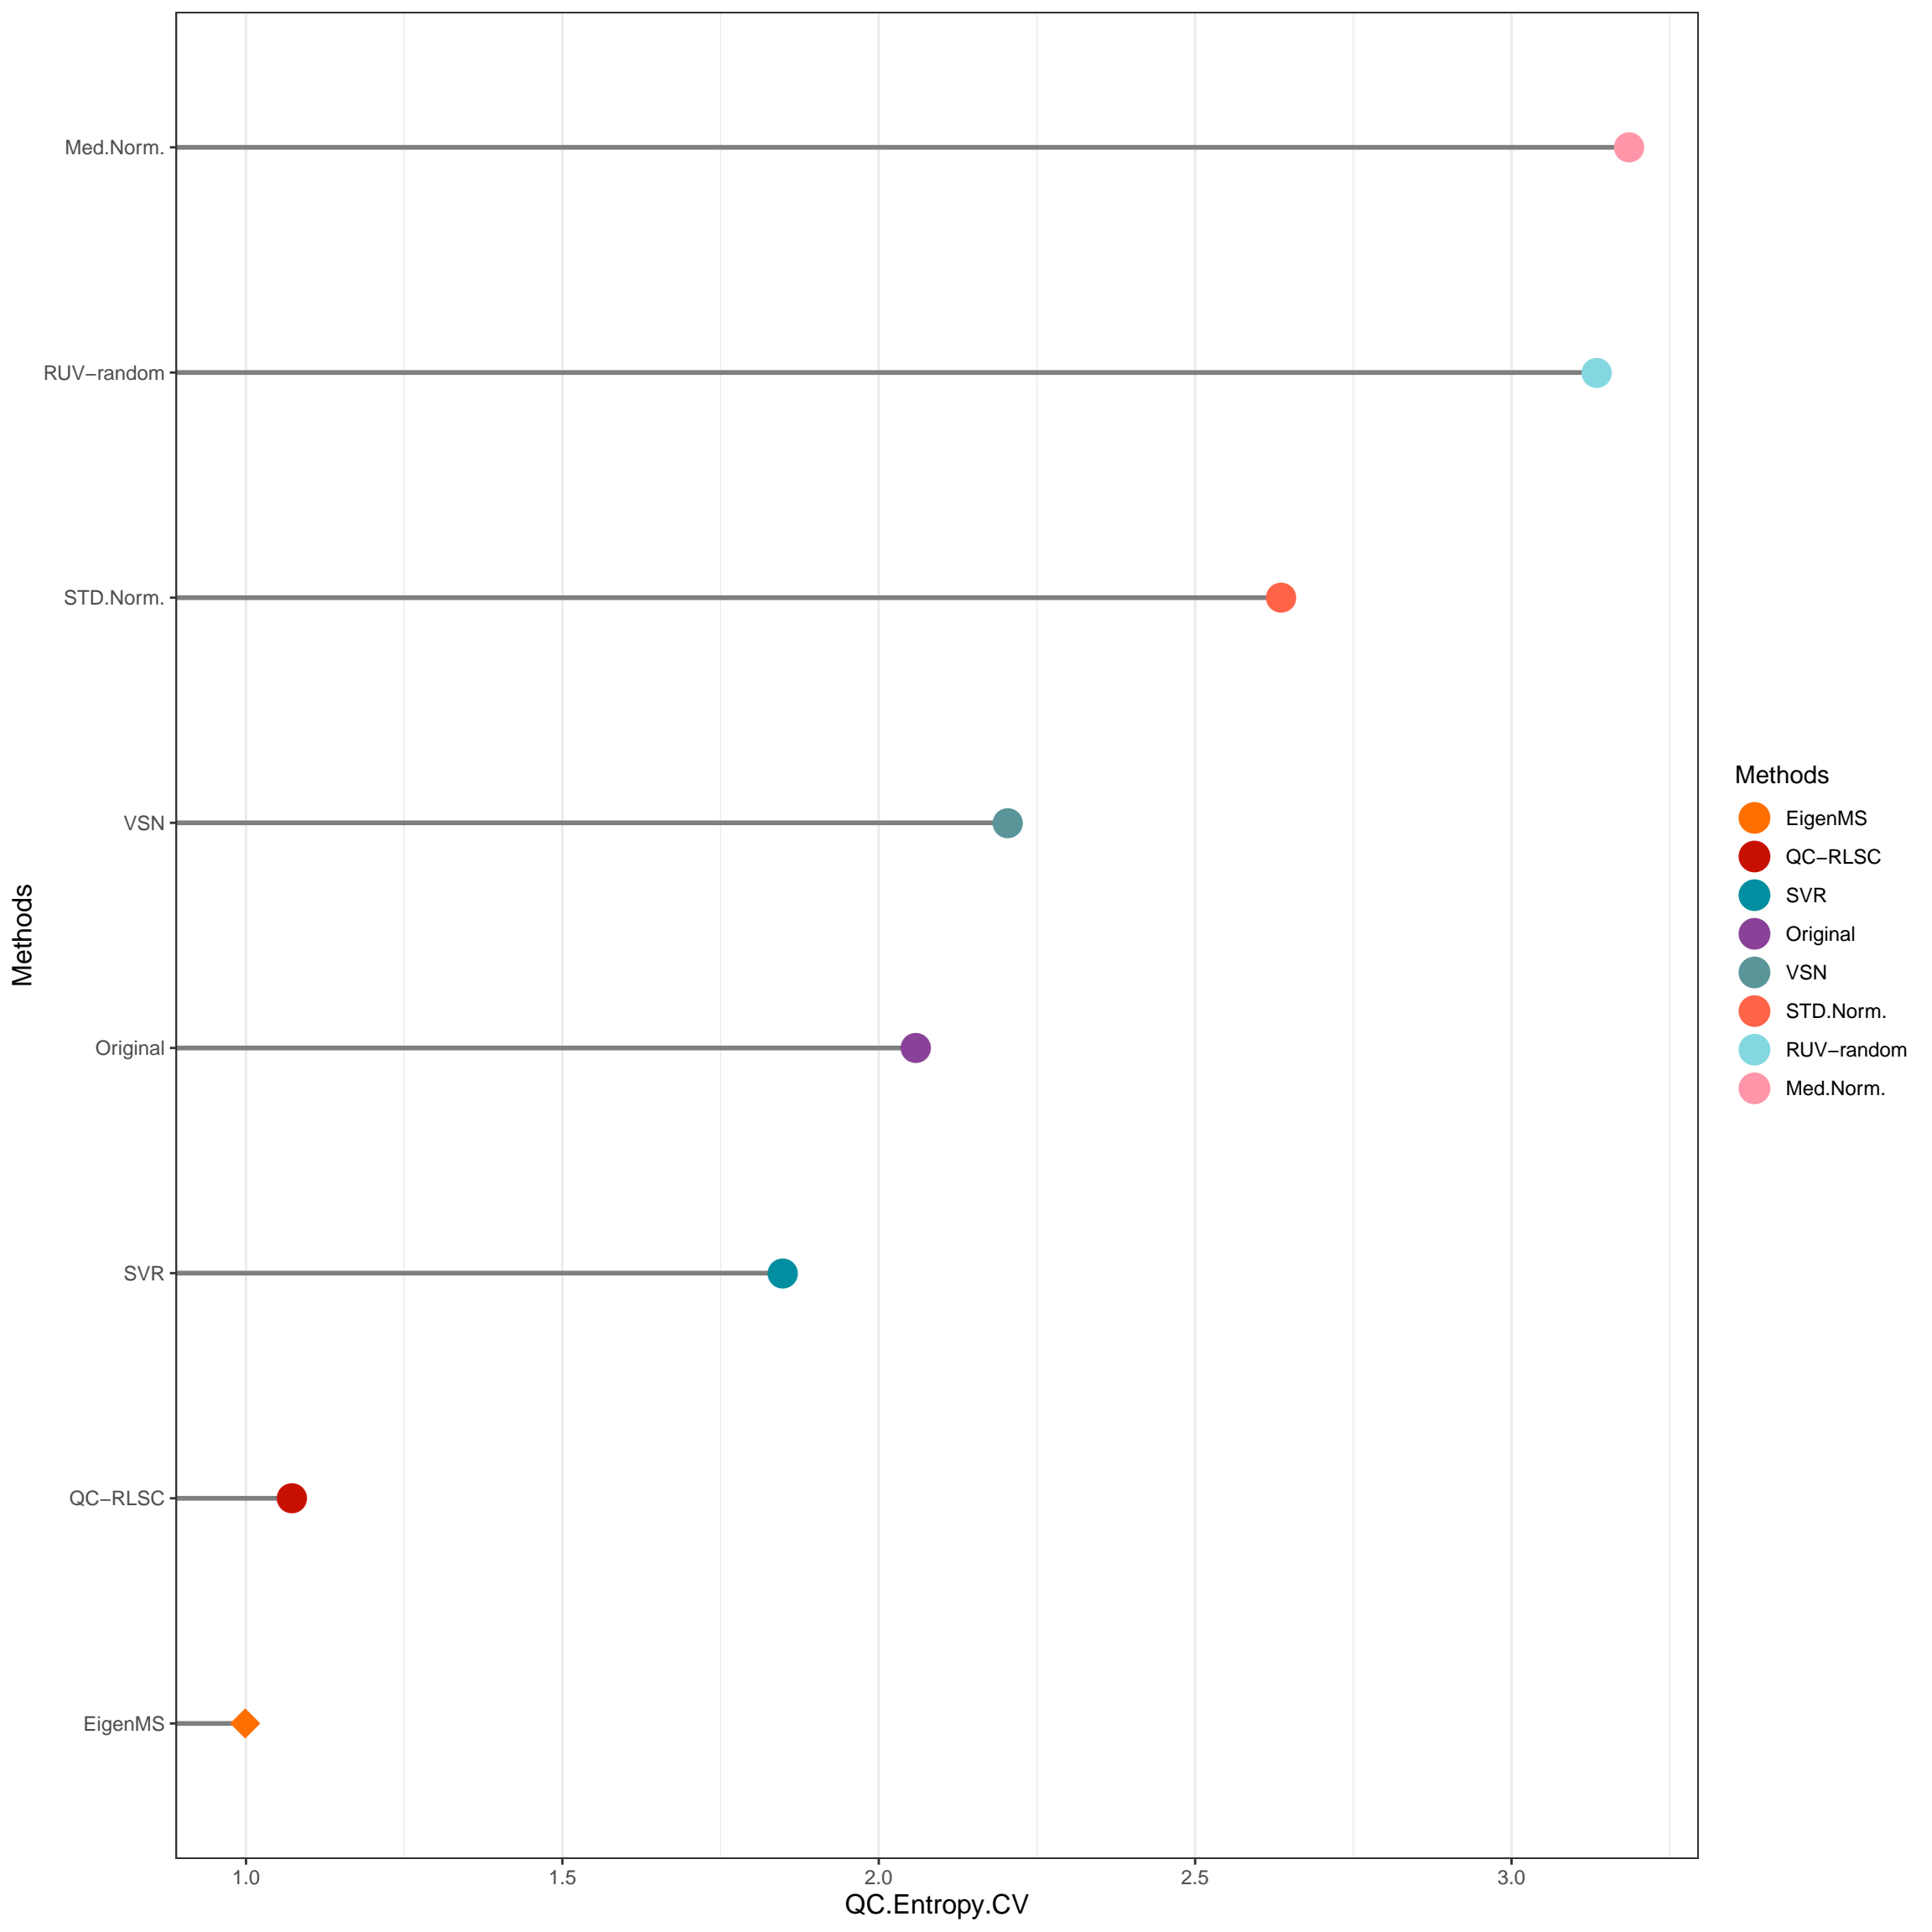

Supplement: s1 [file s1]
